# Supplementary material for: DPPA2/4 and SUMO E3 ligase PIAS4 opposingly regulate zygotic transcriptional program
Source: PLoS Biol. 2019 Jun 21;17(6):e3000324. doi: 10.1371/journal.pbio.3000324 (PMC6608977; doi:10.1371/journal.pbio.3000324)
Supplement: S7 Table — Sequence information of forward and reverse primers used for Pias4, Dppa2, Dppa4, and various ZGA transcripts in qPCR. Dppa, developmental pluripotency associated; qPCR, quantitative PCR; Pias4, protein inhibitor of activated STAT 4; ZGA, zygotic genome activation. (XLSX) [file pbio.3000324.s015.xlsx]

## Sheet: S7 Table
Primers	Sequence (5'→3')
Sumo1 forward	CCCCCGGGTGAATCCA
Sumo1 reverse	TTCTTATCGCCTAAGTCCTCAGTTG
Sumo2 forward	GCAGATCAGATTCCGGTTTGA
Sumo2 reverse	CTTCATCCTCCATTTCCAACTGT
Pias4 forward	GGACCAATACCCACCCAACA
Pias4 reverse	GCCCGGCACTGAGCAGTA
MERVL forward	ATCTCCTGGCACCTGGTATG
MERVL reverse	AGAAGAAGGCATTTGCCAGA
Zscan4 forward	GAGATTCATGGAGAGTCTGACTGATGAGTG
Zscan4 reverse	GCTGTTGTTTCAAAAGCTTGATGACTTC
Zscan4d forward	GCAGATGCCAGTAGACACCA
Zscan4d reverse	GGCATCAAGAGGGAATTGAA
Dux forward	AACCCACGACCAGGCTTTG
Dux reverse	CCGAGCTCTTCGGTTTTGAA
Cml2 forward	AGAGCCAGAAGTCTCCCCAT
Cml2 reverse	TCATGCCGCTGGAGAACAAT
Zfp352 forward	AGAGGACAAGACCCAGTGCAG
Zfp352 reverse	GAGGTCCTCATCTGACCCAAG
Actb forward	CCACCATGTACCCAGGCATT
Actb reverse	CCGATCCACACAGAGTACTT
Dppa2 forward	AGCCGTGCAAAGAAAAATGC
Dppa2 reverse	TATTCTTCCATTCCCTTTAGATCAGAGT
Dppa2 CDS forward	GTGGTGTCCTGGAAATTCTAACTTC
Dppa2 CDS reverse	AGCTGCTCTCATGGCAATCC
Sumo2-Dppa2 forward	GATTGATGTGTTCCAGCAGCAGACT
Sumo2-Dppa2 reverse	TCCTTAAAGGGGACCAGCGTTAAAATC
Dppa4 forward	TGAACCTGATTCACCGAGATGT
Dppa4 reverse	TGCTGCTCACTCGTTTCTTCTG
Rif1 forward	GCAAGGATGTTGAGACTGAGC
Rif1 reverse	TAGAGGCACTGGCAAGTATGTC
Chaf1a forward	GACTCTCGCTTGTTCACCGGGAA
Chaf1a reverse	TTGGTGGGTCGTCGAGTGCTAGC
Spike-in GFP forward	TCAAGGAGGACGGCAACATC
Spike-in GFP reverse	TTCTTCTGCTTGTCGGCCAT
